# Supplementary material for: Hyaluronic Acid Functionalization with Jeffamine® M2005: A Comparison of the Thermo-Responsiveness Properties of the Hydrogel Obtained through Two Different Synthesis Routes
Source: MDPI journal article supplement (doi:10.3390/gels7030088), 2021-07-09
Supplement: s1 [file s1]

## Supplementary Materials

### 1. Synthesis of HA-g<sub>(EDC)</sub>-M2005 in water.

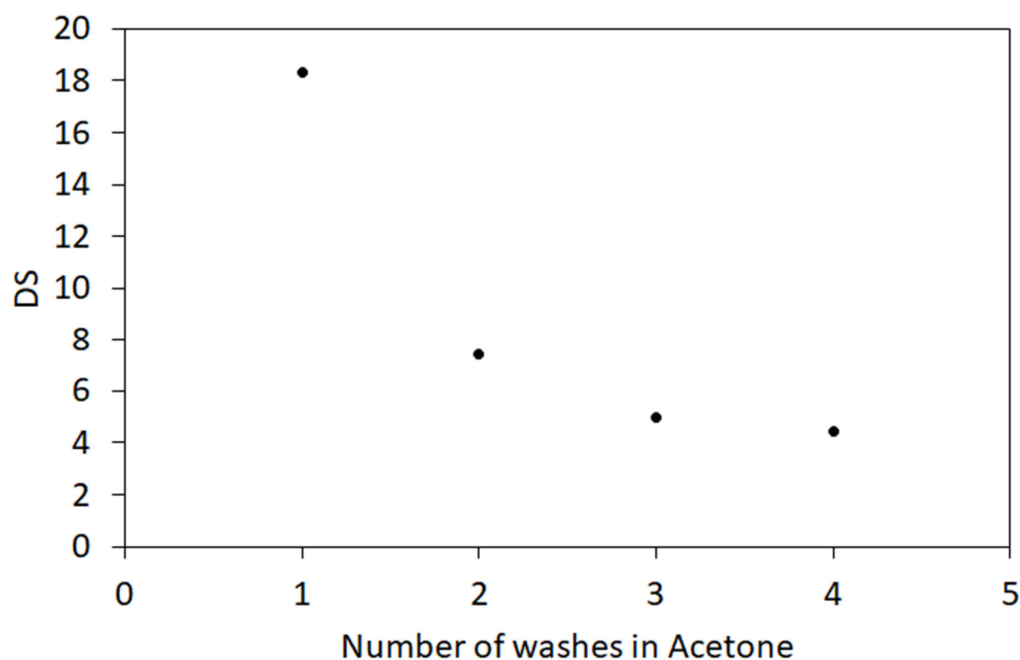

**Figure S1.** HA<sub>1200</sub>-g<sub>(EDC)</sub>-M2005-4.5% DS evolution with the number of washes in Acetone (DS was determined through <sup>1</sup>H NMR measurements).

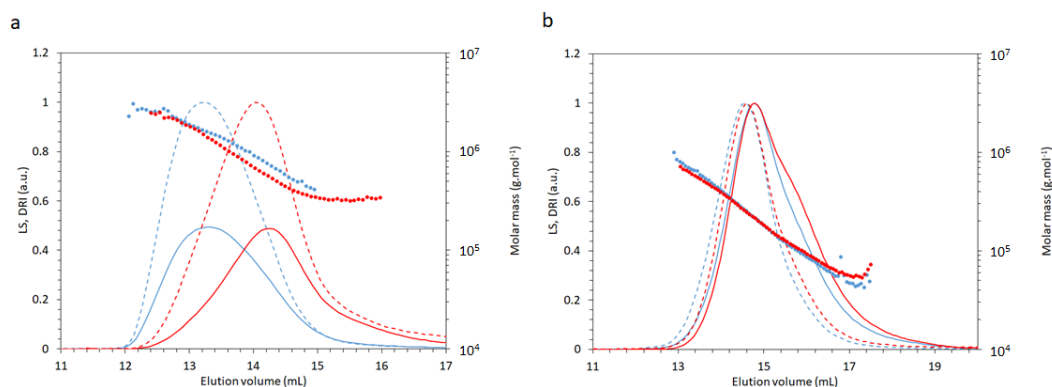

**Figure S2.** Molar mass distribution of a) HA<sub>1200</sub> (blue), HA<sub>1200</sub>-g(EDC)-M2005-4.5% (red) and b) HA<sub>140</sub> (blue), HA<sub>140</sub>-g(EDC)-M2005-3.9% (red); full lines: DRI; dotted lines: LS; full circles: molar mass distribution.

### 2. Characterisation of the starting HA batches

HA<sub>38</sub>, HA<sub>140</sub> and HA<sub>1200</sub> dilute and semi-dilute domains were determined through low shear viscometry measurements using a Low Shear 400 Rheometer from Lamy Rheology (France). Samples were prepared in Milli-Q water. Measurements were performed in the Newtonian domain at low shear rate ( $\leq 5 \text{ s}^{-1}$ , after having screened the starting solution at different shear rates) with a LS11 geometry. The HA solution was gradually diluted from the starting solution (whose concentration depended on the probed HA batch), so the dilution domains and the critical overlapping concentration  $C^*$  could subsequently be determined by plotting the evolution of the specific viscosity  $\eta_{\text{spe}}$  as a function of the HA mass concentration using a logarithmic scale.  $\eta_{\text{spe}}$  was determined using formulae. S1:

$$\eta_{spe} = \frac{\eta - \eta_0}{\eta_0} \quad (S1)$$

with  $\eta$  the measured viscosity of the solution and  $\eta_0$  the viscosity of the solvent. The results of both SEC/MALS and  $C^*$  measurements are summed up in table 1.

**Table S1.** Summary of the properties of the different HA batches.

| Samples            | $M_n$ (g/mol) (SEC/MALS) | $M_w$ (g/mol) (SEC/MALS) | $C^*$ (g/L, MQ) (Low Shear) |
|--------------------|--------------------------|--------------------------|-----------------------------|
| HA <sub>38</sub>   | 38 000                   | 64 000                   | 8.5                         |
| HA <sub>140</sub>  | 140 000                  | 210 000                  | 4.8                         |
| HA <sub>1200</sub> | 1 200 000                | 1 500 000                | 0.8                         |

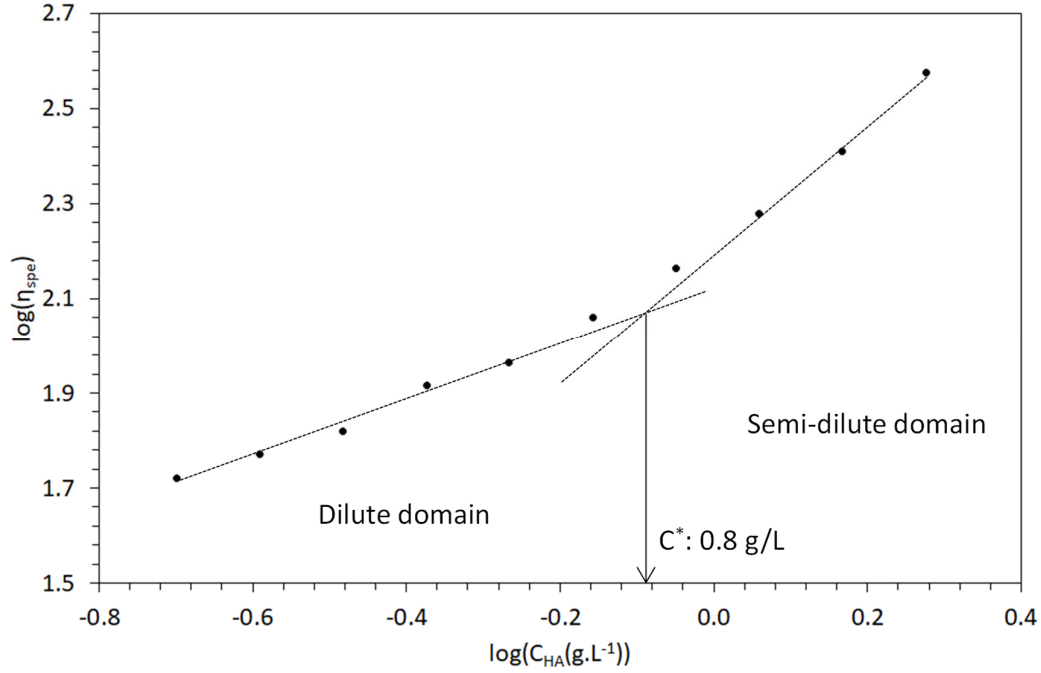

**Figure S3.** Dilute and semi-dilute domains of HA<sub>1200</sub> in Milli-Q water as determined through low shear viscosity measurements. The crossing of the two linear domains is giving the  $C^*$ .

The  $DP_n$  values of HA-g-M2005 samples reported in Table 2 were calculated using Eq. (S2):

$$DP_n = \frac{M_n}{DS \times (M_{M2005} + Mu_{HA} - M_H) + (1 - DS) \times Mu_{NaHA}} \quad (S2)$$

Where  $M_n$  is the corresponding HA-g-M2005 average molar mass in number determined through SEC/MALS/VD/DRI measurements.  $M_{M2005}$  is the Jeffamine® M2005 molar mass, DS the grafting degree of M2005 on HA obtained from Eq. (1a) (HA-g(EDC)-M2005) or Eq. (1b) (HA-g(T3P)-M2005) with  $^1H$  NMR spectroscopy (Fig. 3),  $Mu_{HA}$  the molar mass of the acid form of HA disaccharide unit,  $M_H$  the molar mass of hydrogen and  $Mu_{NaHA}$  the molar mass of the sodium form of HA disaccharide unit. Concerning  $Mu_{NaHA}$ , for the sake of simplification, HA was assumed to be in its sodium salt form for this calculation. It is actually in equilibrium with the lithium salt form, also SEC/MALS/VD/DRI is only taking into account the fraction of condensed counter-ions [31]. Considering sodium or lithium salt will barely affect the calculated values, and more importantly, the observed tendencies will remain unaffected.

### 3. Rheological properties of HA-g-M2005

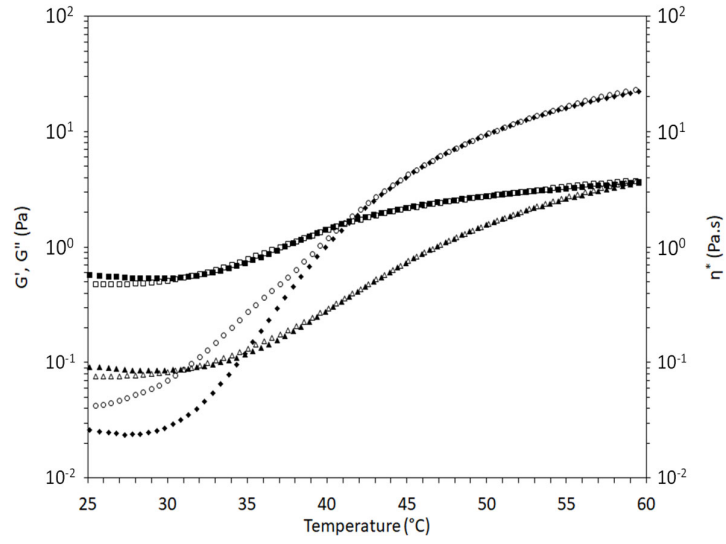

**Figure S4.** Rheological profile of HA<sub>1200</sub>-g(EDC)-M2005-4.5% at 1 wt% in water (with cooling ramp). Heating ramp:  $G'$  (full square),  $G''$  (full rhombus),  $\eta^*$  (full triangle) vs temperature; cooling ramp:  $G'$  (empty square),  $G''$  (empty rhombus),  $\eta^*$  (empty triangle) measurement in oscillation mode (parameters: shear stress: 0.1 Pa; frequency: 1 Hz; rate: 0.5 °C.min<sup>-1</sup>).

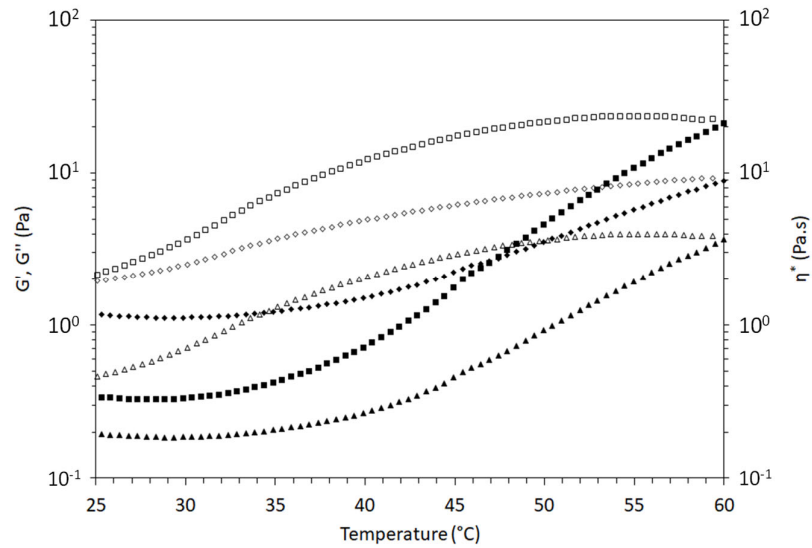

**Figure S5.** Rheological profile of HA<sub>140</sub>-g(T3P)-M2005-8.3% at 2 wt% in water (with cooling ramp). Heating ramp:  $G'$  (full square),  $G''$  (full rhombus),  $\eta^*$  (full triangle) vs temperature; cooling ramp:  $G'$  (empty square),  $G''$  (empty rhombus),  $\eta^*$  (empty triangle) measurement in oscillation mode (parameters: shear stress: 0.1 Pa; frequency: 1 Hz; rate: 0.5 °C.min<sup>-1</sup>).
